# Supplementary material
Source: HighWire-hosted journal article supplement (https://care.diabetesjournals.org/content/suppl/2008/06/18/dc08-0029)
Supplement: Binder1.pdf [file Binder1.pdf]

**Online Appendix Table 1. Changes in waist circumference, lipoprotein profiles, and blood pressure from baseline to Month 4 and from baseline to Month 12 (4-Mo and 12-Mo Evaluable Subjects)**

|                              | Pramlintide |               |               |               |               |              |               |
|------------------------------|-------------|---------------|---------------|---------------|---------------|--------------|---------------|
|                              | Placebo     | 120 µg<br>BID | 120 µg<br>TID | 240 µg<br>BID | 240 µg<br>TID | 360 µg BID   | 360 µg<br>TID |
| <b>Waist (cm)</b>            |             |               |               |               |               |              |               |
| Mo-4 Baseline                | 113.0±2.3   | 110.7±2.3     | 113.9±1.9     | 114.4±2.3     | 114.3±2.0     | 116.2±2.3    | 114.6±1.7     |
| Change to Mo-4               | -4.2±0.9    | -4.8±0.9      | -6.6±1.0*     | -6.0±1.0      | -6.9±1.0*     | -6.7±1.0     | -4.3±0.9      |
| Mo-12 Baseline               | 110.0±3.5   | 109.2±2.4     | 115.8±2.4     | 114.2±3.6     | 113.0±3.0     | 114.3±3.1    | 114.0±3.1     |
| Change to Mo-12              | -4.1±2.1    | -4.7±0.8      | -7.9±1.8*     | -10.0±3.0     | -11.1±1.8**   | -9.9±1.9**   | -6.4±1.7      |
| <b>HDL-c (mg/dL)</b>         |             |               |               |               |               |              |               |
| Mo-4 Baseline                | 50.8±2.1    | 51.9±2.3      | 53.0±2.5      | 49.3±2.5      | 49.6±1.9      | 49.5±2.1     | 53.5±1.9      |
| Change to Mo-4               | 1.56±0.90   | 2.24±1.02     | 1.81±1.52     | 2.39±0.98     | 1.89±0.84     | 1.03±1.01    | 0.00±0.96     |
| Mo-12 Baseline               | 51.7±3.2    | 52.0±3.2      | 50.6±2.4      | 48.3±3.2      | 54.3±2.7      | 50.0±3.6     | 56.6±3.1      |
| Change to Mo-12              | -0.50±1.56  | 3.65±1.69     | 4.48±1.74**   | 2.88±1.70     | 2.86±1.33     | 4.19±1.33    | 2.94±2.07     |
| <b>LDL-c (mg/dL)</b>         |             |               |               |               |               |              |               |
| Mo-4 Baseline                | 128.1±5.7   | 118.5±4.9     | 117.8±6.0     | 119.9±5.2     | 120.3±4.2     | 121.7±5.2    | 123.8±4.7     |
| Change to Mo-4               | 0.56±2.72   | -1.22±2.99    | -1.59±2.55    | 1.68±3.28     | -4.43±2.65    | -0.87±4.61   | 0.34±2.76     |
| Mo-12 Baseline               | 131.8±8.4   | 113.2±6.0     | 115.3±8.7     | 119.1±8.3     | 126.8±5.8     | 124.3±7.4    | 121.8±5.2     |
| Change to Mo-12              | -4.63±5.37  | 2.48±4.74     | -6.04±4.28    | 8.24±8.45     | -2.71±4.00    | -5.10±5.84   | -0.19±4.37    |
| <b>Triglycerides (mg/dL)</b> |             |               |               |               |               |              |               |
| Mo-4 Baseline                | 133.7±7.5   | 127.7±10.4    | 129.3±11.5    | 117.4±9.3     | 133.0±8.5     | 139.1±12.4   | 125.3±8.8     |
| Change to Mo-4               | -2.29±5.96  | 5.00±10.44    | -5.76±8.39    | 5.75±11.35    | -14.64±6.94   | -12.82±8.71  | 7.76±7.40     |
| Mo-12 Baseline               | 153.8±17.6  | 132.5±14.4    | 124.3±15.8    | 129.1±12.7    | 135.2±14.0    | 156.3±19.6   | 115.9±8.4     |
| Change to Mo-12              | -4.38±10.69 | 14.09±10.50   | -2.84±10.45   | -0.59±10.50   | -8.36±15.28   | -17.24±21.87 | -10.47±9.48   |
| <b>Systolic BP (mmHg)</b>    |             |               |               |               |               |              |               |
| Mo-4 Baseline                | 124.1±2.5   | 121.1±1.9     | 123.4±2.1     | 120.4±2.0     | 123.9±2.2     | 126.6±1.9    | 120.2±1.6     |
| Change to Mo-4               | -1.9±1.8    | -1.3±2.0      | -1.0±2.3      | -3.9±1.7      | -2.5±1.8      | -5.5±1.4     | 0.7±1.6       |
| Mo-12 Baseline               | 122.7±3.3   | 122.1±2.7     | 124.4±2.4     | 118.4±2.8     | 121.7±3.0     | 126.7±2.6    | 121.9±2.6     |
| Change to Mo-12              | -0.3±3.2    | 0.3±3.1       | -4.9±2.1      | -1.5±2.7      | -0.4±2.0      | -7.3±3.1     | 3.5±2.6       |
| <b>Diastolic BP (mmHg)</b>   |             |               |               |               |               |              |               |
| Mo-4 Baseline                | 77.4±1.7    | 76.4±1.2      | 79.0±1.2      | 77.2±1.4      | 78.8±1.1      | 79.4±1.3     | 78.0±1.1      |
| Change to Mo-4               | -1.1±1.4    | -1.9±1.2      | -1.3±1.4      | -4.8±1.1*     | -3.1±1.0      | -2.4±1.2     | -2.1±1.2      |
| Mo-12 Baseline               | 79.5±1.8    | 77.2±1.6      | 78.5±1.4      | 76.3±1.6      | 77.0±1.6      | 80.8±1.6     | 79.4±1.7      |
| Change to Mo-12              | -0.4±2.8    | 2.4±2.1       | -3.0±1.5      | -0.9±2.0      | 0.1±2.0       | -3.6±1.8     | -0.6±2.3      |

Mean±SE; \*P<0.05; \*\*P<0.01 versus placebo

**Online Appendix Table 2. Adverse events occurring at with an incidence  $\geq 2.5\%$  and greater in the pooled pramlintide treatment group than with placebo (ITT)**

|                             | Placebo<br>n (%) | Pramlintide     |                             |                             |                             |                             |                             |                             |
|-----------------------------|------------------|-----------------|-----------------------------|-----------------------------|-----------------------------|-----------------------------|-----------------------------|-----------------------------|
|                             |                  | Pooled<br>n (%) | 120 $\mu$ g<br>BID<br>n (%) | 120 $\mu$ g<br>TID<br>n (%) | 240 $\mu$ g<br>BID<br>n (%) | 240 $\mu$ g<br>TID<br>n (%) | 360 $\mu$ g<br>BID<br>n (%) | 360 $\mu$ g<br>TID<br>n (%) |
| <b>Main Study (N = 408)</b> |                  |                 |                             |                             |                             |                             |                             |                             |
| Nausea                      | 1 (1.7)          | 67 (19.2)       | 11 (18.6)                   | 10 (16.9)                   | 9 (16.7)                    | 5 (8.9)                     | 14 (23.7)                   | 18 (29.0)                   |
| Diarrhea                    | 2 (3.4)          | 15 (4.3)        | 2 (3.4)                     | 3 (5.1)                     | 3 (5.6)                     | 1 (1.8)                     | 3 (5.1)                     | 3 (4.8)                     |
| Headache                    | 0 (0.0)          | 15 (4.3)        | 6 (10.2)                    | 2 (3.4)                     | 2 (3.7)                     | 1 (1.8)                     | 0 (0.0)                     | 4 (6.5)                     |
| Injection site<br>bruising  | 1 (1.7)          | 12 (3.4)        | 2 (3.4)                     | 2 (3.4)                     | 2 (3.7)                     | 4 (7.1)                     | 1 (1.7)                     | 1 (1.6)                     |
| Nasopharyngitis             | 1 (1.7)          | 10 (2.9)        | 0 (0.0)                     | 0 (0.0)                     | 1 (1.9)                     | 2 (3.6)                     | 5 (8.5)                     | 2 (3.2)                     |
| Vomiting                    | 0 (0.0)          | 9 (2.6)         | 1 (1.7)                     | 4 (6.8)                     | 0 (0.0)                     | 1 (1.8)                     | 2 (3.4)                     | 1 (1.6)                     |
| Urinary tract<br>infection  | 1 (1.7)          | 9 (2.6)         | 2 (3.4)                     | 0 (0.0)                     | 1 (1.9)                     | 3 (5.4)                     | 2 (3.4)                     | 1 (1.6)                     |
| <b>Extension (N = 209)</b>  |                  |                 |                             |                             |                             |                             |                             |                             |
| Nasopharyngitis             | 2 (7.4)          | 17 (9.3)        | 1 (3.6)                     | 3 (10.3)                    | 4 (16.0)                    | 2 (6.7)                     | 5 (15.6)                    | 2 (5.3)                     |
| Back pain                   | 0 (0.0)          | 9 (4.9)         | 2 (7.1)                     | 1 (3.4)                     | 2 (8.0)                     | 1 (3.3)                     | 1 (3.1)                     | 2 (5.3)                     |
| Nausea                      | 0 (0.0)          | 7 (3.8)         | 0 (0.0)                     | 1 (3.4)                     | 1 (4.0)                     | 0 (0.0)                     | 3 (9.4)                     | 2 (5.3)                     |
| Arthralgia                  | 0 (0.0)          | 6 (3.3)         | 1 (3.6)                     | 1 (3.4)                     | 1 (4.0)                     | 2 (6.7)                     | 0 (0.0)                     | 1 (2.6)                     |
| Depression                  | 0 (0.0)          | 6 (3.3)         | 0 (0.0)                     | 3 (10.3)                    | 1 (4.0)                     | 2 (6.7)                     | 0 (0.0)                     | 0 (0.0)                     |
| Diarrhea                    | 0 (0.0)          | 5 (2.7)         | 0 (0.0)                     | 1 (3.4)                     | 1 (4.0)                     | 1 (3.3)                     | 1 (3.1)                     | 1 (2.6)                     |

**Online Appendix Figure 1. Study Design.** Following a one-week placebo lead-in, pramlintide treatment was initiated at 120  $\mu$ g and was increased by 120- $\mu$ g increments every 2-weeks until the assigned maintenance dose was reached (120, 240 or 360  $\mu$ g).

**Online Appendix Figure 2. Changes in body weight (kg) from baseline (month 0) for BID (A,C) and TID (B,D) treated subjects who never reported nausea in the double-blind study (A-B)(ITT population; n = 340) and single-blind extension (C-D) (ITT population; n = 202)** White circles = placebo; Pramlintide: black triangles = 120  $\mu$ g; white triangles = 240  $\mu$ g; black circles = 360  $\mu$ g. Mean $\pm$ SE

**Placebo  
Lead-In**

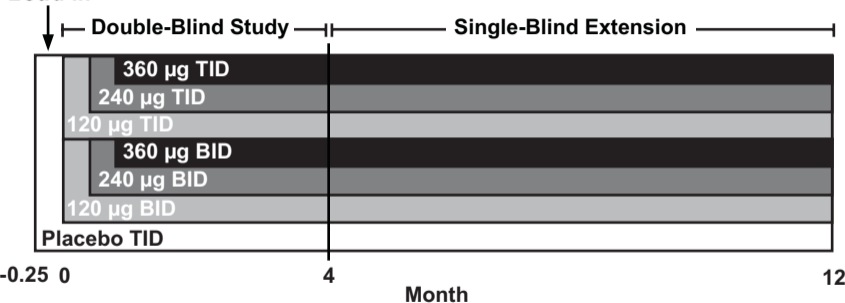

-0.25 0

4

12

**Month**

**Weight Loss LSI**

**Weight Maintenance LSI**

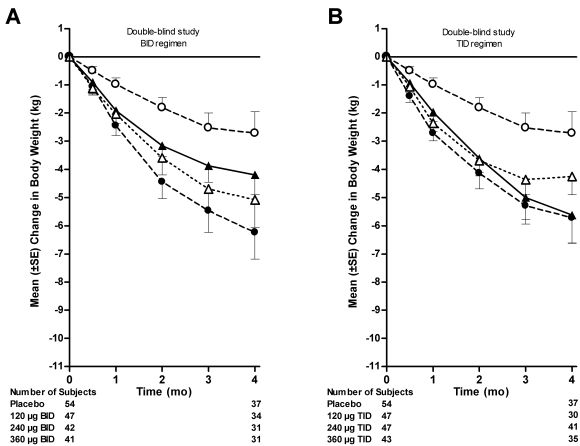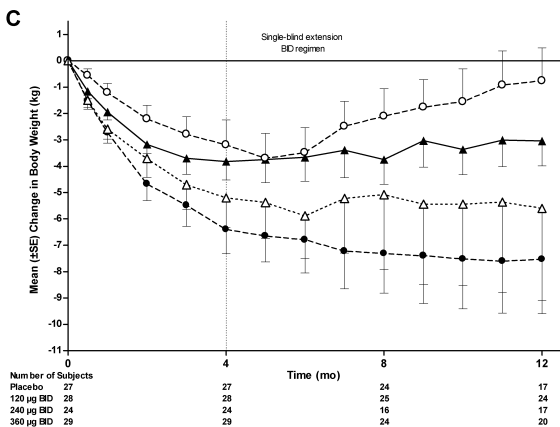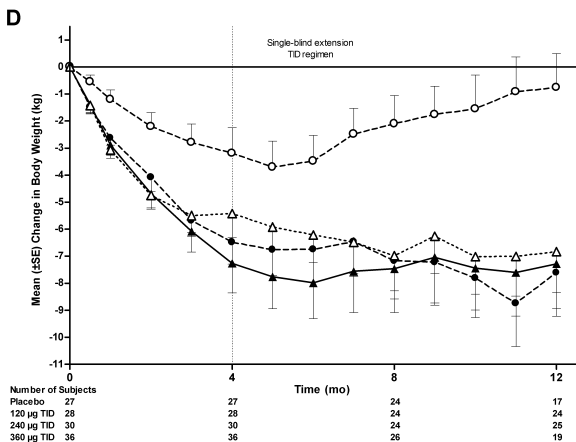

-○- Placebo      --△-- 240  $\mu$ g Pramlintide  
 -▲- 120  $\mu$ g Pramlintide      -●- 360  $\mu$ g Pramlintide
